# Supplementary material for: Characterization of the Difference between Day and Night Temperatures on the Growth, Photosynthesis, and Metabolite Accumulation of Tea Seedlings
Source: MDPI journal article supplement (doi:10.3390/ijms24076718), 2023-04-04
Supplement: s1 [file s1]

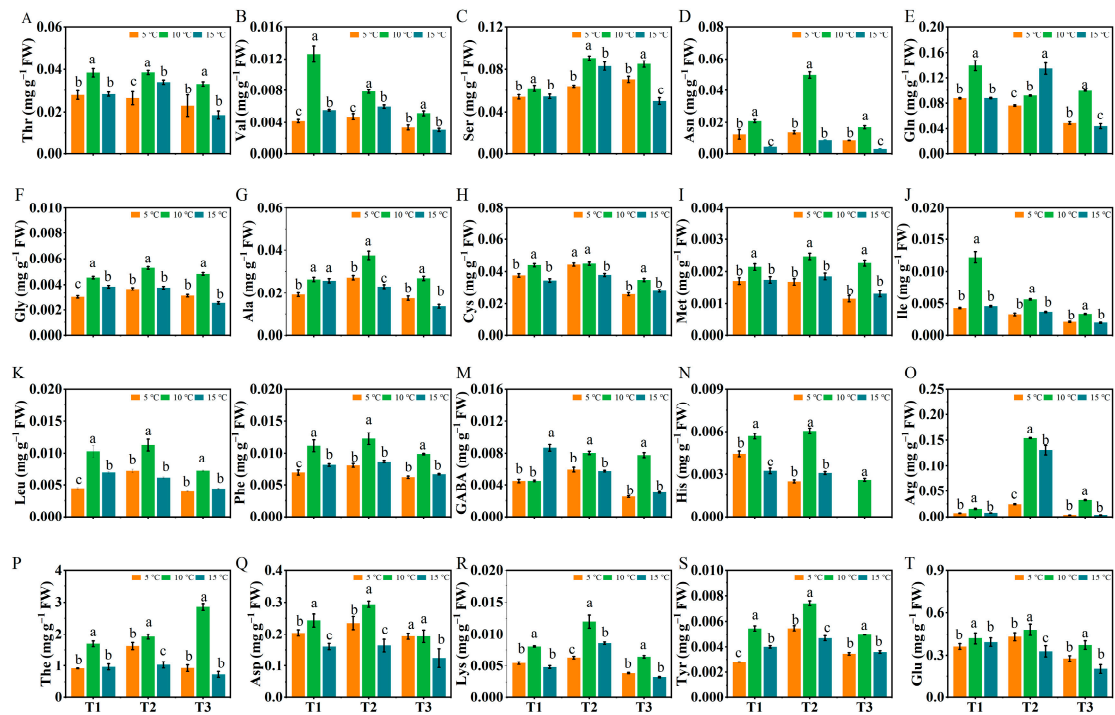

Figure S1. The effects of different DIFs on the contents of amino acid components. (A) Threonine; (B) Valine; (C) Serine; (D) Asparagine; (E) Glutamine; (F) Glycine; (G) Alanine; (H) Cysteine; (I) Methionine; (J) Isoleucine; (K) Leucine; (L) Phenylalanine; (M)  $\gamma$ -aminobutyric acid; (N) Histidine; (O) Arginine; (P) Theanine; (Q) Aspartic acid; (R) Lysine; (S) Tyrosine; (T) Glutamate. Different letters indicate treatments that are significantly different at  $p < 0.05$  ( $n=3$ ).

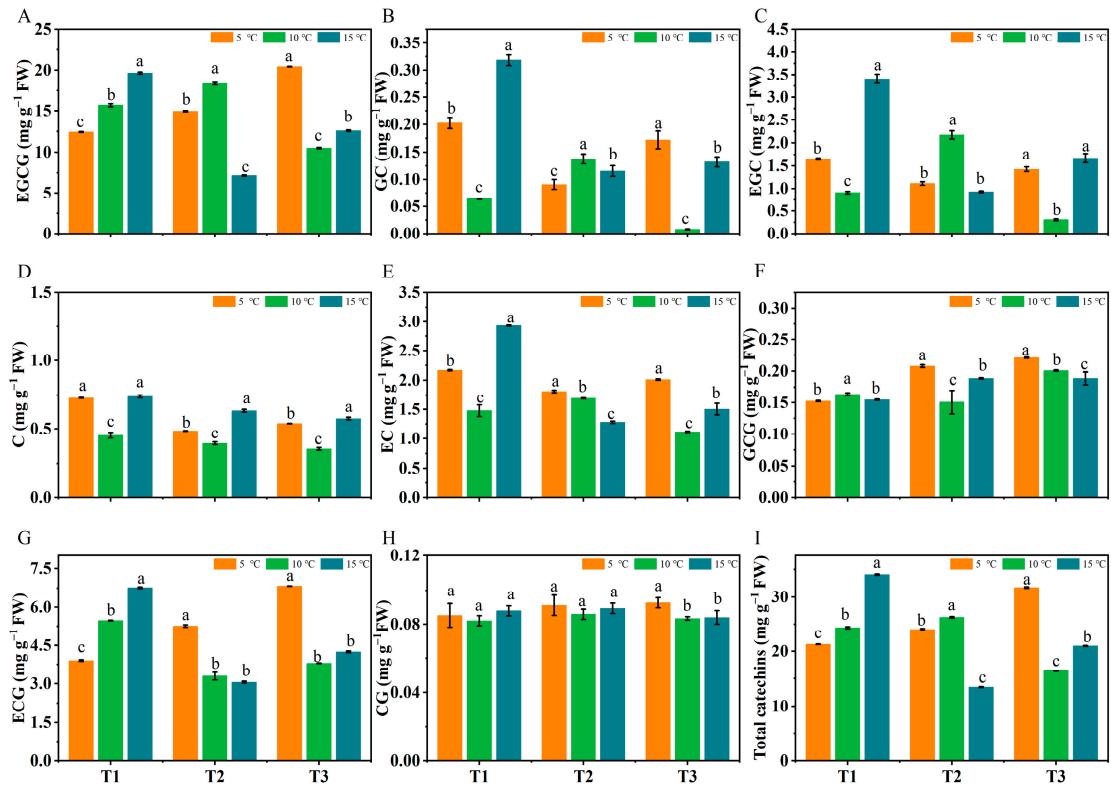

Figure S2. The effects of different DIFs on the contents of catechins components. (A) Epigallocatechin gallate; (B) Gallocatechin; (C) Epigallocatechin; (D) Catechin; (E) Epicatechin; (F) Gallocatechin gallate; (G) Epicatechin gallate; (H) Catechin gallate; (I) Total catechins. Different letters indicate treatments that are significantly different at  $p < 0.05$  ( $n=3$ ).

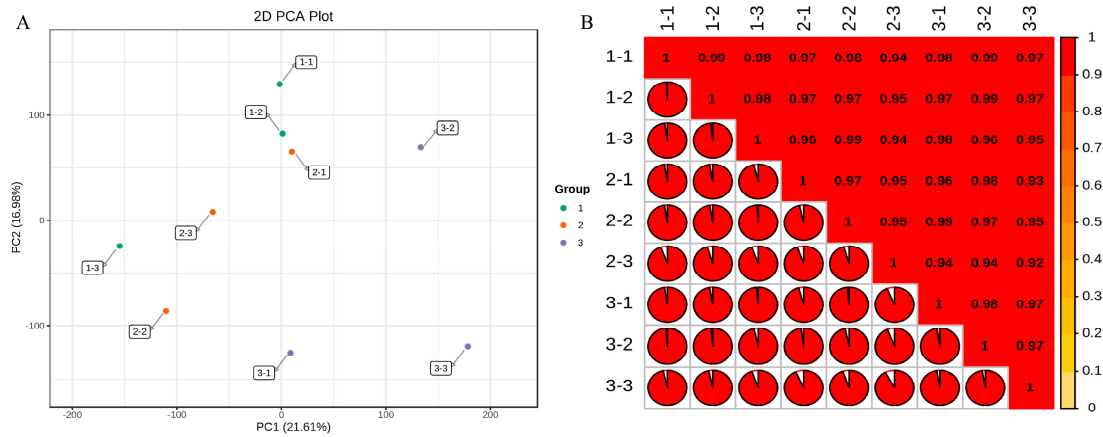

Figure S3. Quality control of transcriptome data. (A) Principal component analysis (PCA); (B) Correlation analysis of samples.

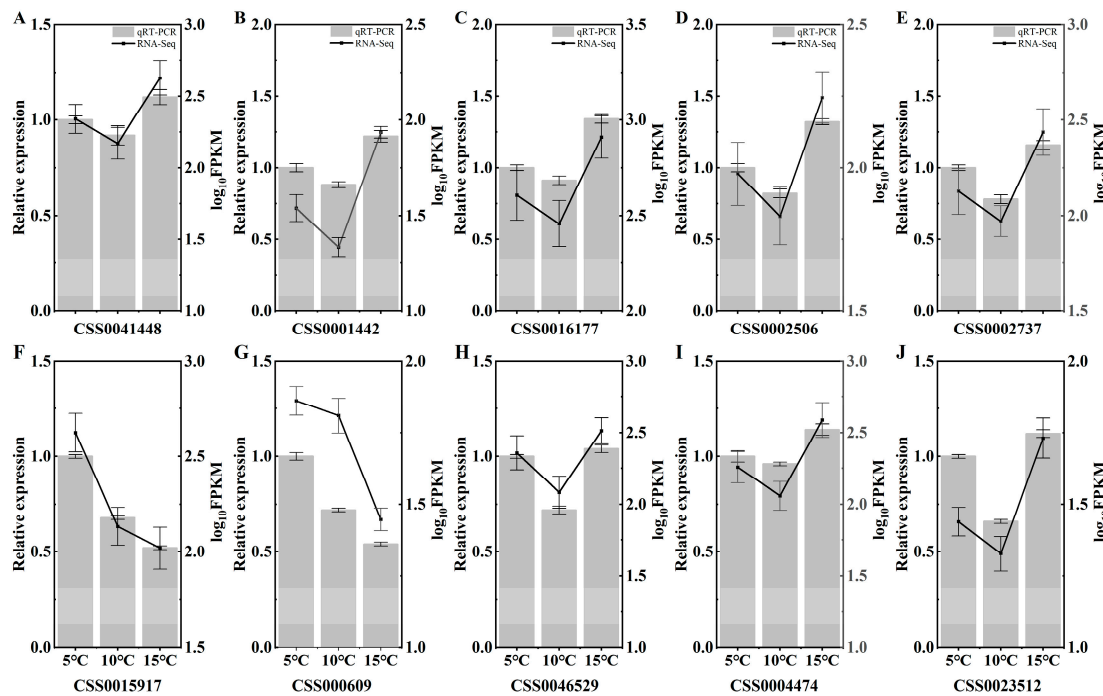

Figure S4. Validation of the differentially expressed genes by qRT-PCR.

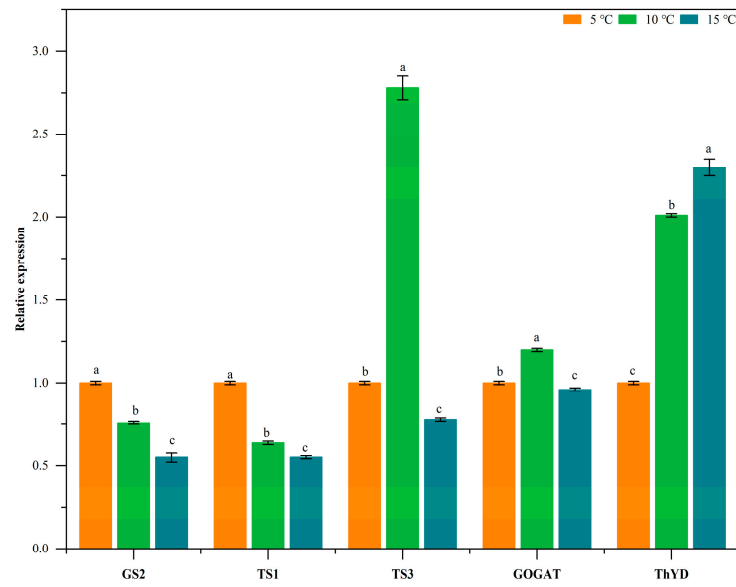

Figure S5. The expression of genes related to the theanine biosynthesis in tea leaves under different DIFs. (A) Glutamine synthetase; (B) Theanine synthetase 1; (C) Theanine synthetase 3; (D) Glutamate synthase; (E) Theanine hydrolase. Different letters indicate treatments that are significantly different at  $p < 0.05$  ( $n=3$ ).
