# Supplementary material for: Characterization of the Difference between Day and Night Temperatures on the Growth, Photosynthesis, and Metabolite Accumulation of Tea Seedlings
Source: Int J Mol Sci. 2023 Apr 4;24(7):6718. doi: 10.3390/ijms24076718 (PMC10095163; doi:10.3390/ijms24076718)
Supplement: Supplementary file 1 [file ijms-24-06718-s001.zip › Supplementary Table.xlsx]

## Sheet: Table S1
Table S1 Statistics of Illumina reads and comparison with tea pant genome
Samples	Clean reads	Mapped Reads		Mapped ratio	Clean bases	Error rate	GC Content %	≥Q20	≥Q30
				%	G			%	%
1_1	48370490	41630779		86.07	7.26	0.03	45.08	97.61	93.32
1_2	44594684	38282617		85.85	6.69	0.03	44.79	97.48	93.1
1_3	62479802	53668708		85.9	9.37	0.03	45.06	97.45	93.02
2_1	47877954	41156798		85.96	7.18	0.03	45.05	97.53	93.21
2_2	47690168	41003768		85.98	7.15	0.03	45	97.64	93.42
2_3	45531372	39018390		85.7	6.83	0.03	45.13	97.72	93.64
3_1	51751166	44613047		86.21	7.76	0.03	44.74	97.5	93.15
3_2	47103382	40598478		86.19	7.07	0.03	44.82	97.46	93.05
3_3	48126214	41584406		86.41	7.22	0.03	44.47	97.75	93.67

## Sheet: Table S2
	Table S2 The expression patterns of DEGs involved in Plant hormone transduction
Pathway	Gene id	5℃ FPKM	10℃ FPKM	15℃ FPKM	gene name	Related hormone
Plant hormone signal transduction	CSS0000235	63.7033	73.79	38.89	IAA	IAA
	CSS0000357	4.55	2.38	6.07	IAA
	CSS0016015	36.3967	27.17	17.76	IAA
	CSS0019320	409.153	212.403	157.35	IAA
	CSS0019669	45.5567	39.7933	19.6933	IAA
	CSS0010306	12.8833	3.57667	8.09333	IAA
	CSS0001919	20.3333	3.46667	2.58333	GH3
	CSS0024964	1.82667	1.08333	0.646667	GH3
	CSS0032471	0.58	1.21	0.29	GH3
	CSS0044950	3.41667	4.11	0.816667	GH3
	CSS0045189	46.35	36.4567	22.4533	SAUR
	CSS0024285	113.4	36.43	30.4867	SAUR
	CSS0031673	9.00667	5.51333	2.82	SAUR
	CSS0035196	24.8333	14.9667	9.58667	SAUR
	novel.6694	0.874479	1.30478	1.90529	SAUR
	novel.10525	1.30652	0.363202	0.403431	SAUR
	CSS0031258	7.09	8.74	3.56333	ARR-B	CTK
	CSS0014748	16.3733	23.8533	10.0533	ARR-B
	CSS0049738	8.14	5.40333	3.43333	ARR-B
	CSS0021200	0.853333	3.65333	0.606667	ARR-A
	CSS0031361	5.43	3.46333	2.84333	GID1	GA
	CSS0029115	3.56333	3.77	1.27333	GID1
	CSS0004492	10.9867	4.40333	22.46	GID1
	CSS0021693	9.77	6.51	4.4	GID1
	CSS0020123	95.2667	35.0733	32.2567	DELLA
	CSS0010595	27.7867	6.38333	16.7267	BRI1	BR
	CSS0009130	4.19	1.30667	1.84333	TCH4	BR
	CSS0043212	15.7933	18.61	6.34667	BRI1	BR
	CSS0047119	2.05	0.666667	0.33	TCH4	BR
	CSS0010246	12.75	5.37667	3.37667	TCH4	BR
	CSS0010469	12.5833	6.95333	5.04667	TCH4	BR
	novel.5176	23.5968	9.91445	6.90512	TCH4	BR
	CSS0031905	127.34	73.1033	53.8133	JAZ	JA
	CSS0028417	4.79333	0.96	4.78667	COI1	JA
Plant hormone signal transduction;MAPK signaling pathway - plant	CSS0049233	8.27	9.81667	4.55333	BAK1	BR
	CSS0009166	8.01667	30.3833	13.1833	MYC2	JA
	CSS0029111	27.02	13.6367	12.1233	MYC2	JA
	CSS0015224	4.04333	3.45667	0.86	MYC2	JA
	CSS0017736	14.43	6.1	12.9467	PYL	ABA
	CSS0011319	6.98667	3.04	11.3	PYL	ABA
	CSS0039257	1.27667	3.64	3.23333	EBF1/2	ETH
	CSS0002402	13.37	8.44333	3.23333	MKK4_5	ETH
	CSS0012203	0.453333	0.476667	3.05667	CTR1	ETH
	CSS0002809	8.27	9.81667	4.55333	MKK4_5	ETH
	CSS0037023	300.113	387.823	163.513	PR1	SA

## Sheet: Table S3
Table S3 The expression patterns of DEGs involved in amino acid metabolism
Pathway	gene ID	gene name	5℃ FPKM	10℃ FPKM	15℃ FPKM
Tyrosine metabolism	CSS0002951	PPO	1.92333	3.95333	5.05333
	CSS0021634	ADH1_7	2.5	3.81667	1.66
	CSS0042539	AOC3	7.19333	4.01	3.09
	novel.12928	HPD	5.09262	6.64438	3.19969
	novel.1845	HPD	5.82367	8.33653	3.61129
Phenylalanine, tyrosine and tryptophan biosynthesis	CSS0018757	trpB	6.48333	2.44333	0.493333
	CSS0023512	PDT	27.4433	21.22	53.81
	CSS0032292	ADT	31.96	15.88	20.53
	CSS0039256	ADT	22.28	10.9133	12.61
	novel.9104	CM	0.974007	2.14404	1.21151
Valine, leucine and isoleucine degradation	CSS0005724	HIBADH	69.31	26.5733	19.78
	CSS0005847	HIBADH	73.4033	41.3767	23.5633
	CSS0013914	HIBADH	57.33	18.8433	18.5367
	CSS0015917	HIBADH	421.08	135.93	104.51
	CSS0026745	HIBADH	33.2567	14.19	14.95
	CSS0031378	HIBADH	39.3833	16.1967	12.7033
	CSS0031667	HIBADH	119.19	61.6233	39.19
	CSS0034869	HIBADH	143.837	50.7	54.5267
	CSS0039835	HIBADH	45.63	28.7967	14.78
	CSS0042958	HIBADH	219.55	341.267	85.8167
	CSS0034648	HIBCH	29.0067	12.1767	36.4167
	CSS0038802	HIBCH	34.0133	16.9133	40.2933
	CSS0023496	BCAT	11.2167	7.95	40.8167
Valine, leucine and isoleucine biosynthesis	CSS0023496	BCAT	11.2167	7.95	40.8167
	novel.11593	ALS,ilvB, ilvG, ilvI	0.858473	2.07519	1.64612
Cysteine and methionine metabolism	CSS0008894	ACS	25.2933	4.79333	5.28667
	CSS0014301	DNMT1	7.63667	11.8767	16.9267
	CSS0020675	ADI1	68.2033	73.3267	167.287
	CSS0023496	BCAT	11.2167	7.95	40.8167
	CSS0039562	mtnC	28.48	19.8233	11.3633
	novel.3155	DNMT1	0.773752	3.49619	2.56868
	novel.7841	AMD1	1.90539	1.08096	0.833378
	novel.1777	mtnC	1.22228	1.36288	2.84858
Glycine, serine and threonine metabolism	CSS0006311	SRR	6.77333	2.58	4.24
	CSS0018757	trpA	6.48333	2.44333	0.493333
	CSS0019362	HPR2_3	26.2667	26.8233	10.4933
	CSS0042539	AOC3	7.19333	4.01	3.09
	novel.5267	ltaE	0.294711	2.28068	1.25618
Alanine, aspartate and glutamate metabolism	CSS0006409	ASNS	72.47	64.3633	27.98
	CSS0022909	ASNS	0.153333	0.786667	0.02
	CSS0045670	nadB	7.46333	3.63	6.77
Arginine and proline metabolism	CSS0021330	aguB	7.41333	3.37333	16.4367
	CSS0030403	ODC1	6.66	4.65667	2.63667
	novel.7841	AMD1,speD	1.90539	1.08096	0.833378
Tryptophan metabolism	CSS0006416	ASMT	5.48	9.00667	13.9
Phenylalanine metabolism	CSS0001442	PAL	34.57	21.59	86.1767
	CSS0018870	PAL	12.4267	6.47333	29.8267
	CSS0021474	PAL	36.1	16.8567	88.72
	CSS0041448	PAL	219.093	148.04	424.757
	CSS0042539	AOC3	7.19333	4.01	3.09
	novel.12928	HPD	5.09262	6.64438	3.19969
	novel.1845	HPD	5.82367	8.33653	3.61129
beta-Alanine metabolism	CSS0034648	HIBCH	29.0067	12.1767	36.4167
	CSS0038802	HIBCH	34.0133	16.9133	40.2933
	CSS0042539	AOC3	7.19333	4.01	3.09

## Sheet: Table S4
Table S4 The expression patterns of DEGs involved in Caffeine metabolism
gene ID	gene name	5℃ FPKM	10℃ FPKM	15℃ FPKM
novel.165	TCS	1.93108	5.14682	6.18864

## Sheet: Table S5
Table S5 The expression patterns of DEGs involved in Nitrogen metabolism
Pathway	Gene ID	Gene name	5℃ FPKM	10℃ FPKM	15℃ FPKM
Nitrogen metabolism	CSS0004857	CA	2.59667	7.86333	0.0366667
	CSS0008799	CA	2.64333	2.49	0.273333
	CSS0022041	CA	2.23667	1.61333	0.236667
	CSS0044077	CA	3.67	2.35	0.543333
	CSS0049176	CA	31.04	138.113	31.7767
	novel.9434	CA	2.59756	6.95662	4.04499
	novel.11503	Nrt	0.413935	0	1.15535
	CSS0041903	Nrt	1.46	0.316667	3.37667
	novel.5501	Nrt	0.2484	0.210135	1.00553

## Sheet: Table S6
Table S6 The expression patterns of DEGs involved in Pyruvate, Glycolysis, Citrate cycle metabolism
Pathway	gene ID	gene name	5℃ FPKM	10℃ FPKM	15℃ FPKM
Pyruvate metabolism	CSS0020930	ACACA	4.91	1.46	3.4
	novel.441	malate dehydrogenase	1.29775	0.317525	0.085381
EMP	CSS0001553	AKR1A1	1.29667	0.58	7.21667
	CSS0001719	GPI	36.7367	68.1333	94.3933
	CSS0021634	ADH1_7	2.5	3.81667	1.66
	CSS0031899	ALDO	7.24667	3.03333	1.18667
	CSS0043221	MINPP1	14.0533	6.74667	5.27
TCA	CSS0043962	SDHA	134.827	91.3867	46.5833
	CSS0033750	ACLY	35.5233	29.63	64.08
	CSS0021024	ACLY	14.25	9.41667	21.03

## Sheet: Table S7
Table S7 Primers of genes involved in theanine metabolism
Gene	Forward（5’→3’）	Reverse （5’→3’）
GS 2	GTTTGTTTGGAGTGGGTGT	AGTGCTGGAACCATCGTAG
TS 1	TCTTTCTGGACCTGTGAGTG	GCTTGAGGGTAGATAATGAGT
TS 3	TGTGGAAGCCATGAGTACGA	GTCGCTAACGCTGTGTTTGA
GOGAT	TGGCAGAGGCTGGAATAGG	CAAGTTCCCACGGACCACC
ThYD	CTCGTCCCAGTTTCATCATACA	GTGGAACCTGCTTCTTCTCATT
β-actin	GCCATCTTTGATTGGAATGG	GGTGCCACAACCTTGATCTT

## Sheet: Table S8
Table S8 Primers of qRT-PCR validation
Gene id	Forward（5’→3’）	Reverse （5’→3’）
CSS0041448	GGACAACACTAGGCTGGCTT	CCATAGCTATCTCTGCGCCC
CSS0001442	CACGTCTAGCTGTTGCCTCA	CGTCCCCCGGAAAGATTTGA
CSS0016177	GACTCAAGCGACACACGGAT	TCCGCATTCTTGAACCTCCC
CSS0002506	GGTGTCGGAAGGAGGAGTTG	CAGAACGATGGTCGAGTGCT
CSS0002737	GTGCTCCATACCCAAGGGG	ACCGGTACTGCTGAACCACC
CSS0015917	GCCCTCTTCTGTCTGGCAAA	GGCGAAAAAGACAGGGATGTG
CSS0006409	TTTCTCGCCGGTAACCCATC	ACTGTTGCTTTAGGCTTCCCA
CSS0004474	AAGGACCTGCCACGGTTATG	GGCCTTATGCTCGCTGTTTG
CSS0046529	ATTTATCCGACCGGTCCACG	CCCCAACCTCTTTTAGCCGT
CSS0023512	GACCACAAAGAAAGCGACCG	GCCAATTCCTGCAAATGTCCC
β-actin	GCCATCTTTGATTGGAATGG	GGTGCCACAACCTTGATCTT
